# Supplementary material
Source: PubMed Central journal article supplement (PMC5538766)

**Figure 1C**

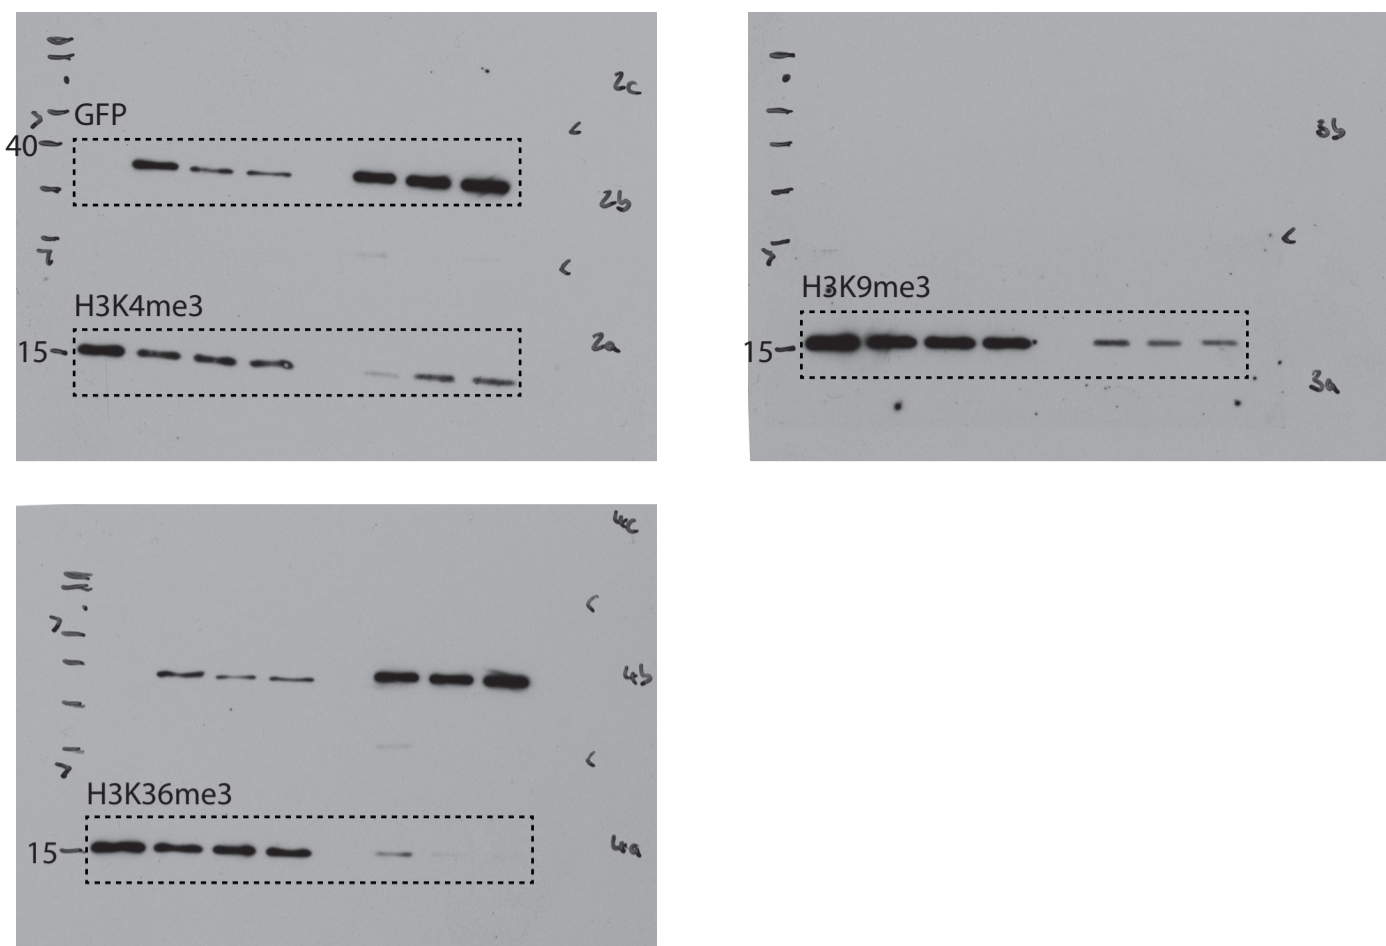

**Figure 1D**

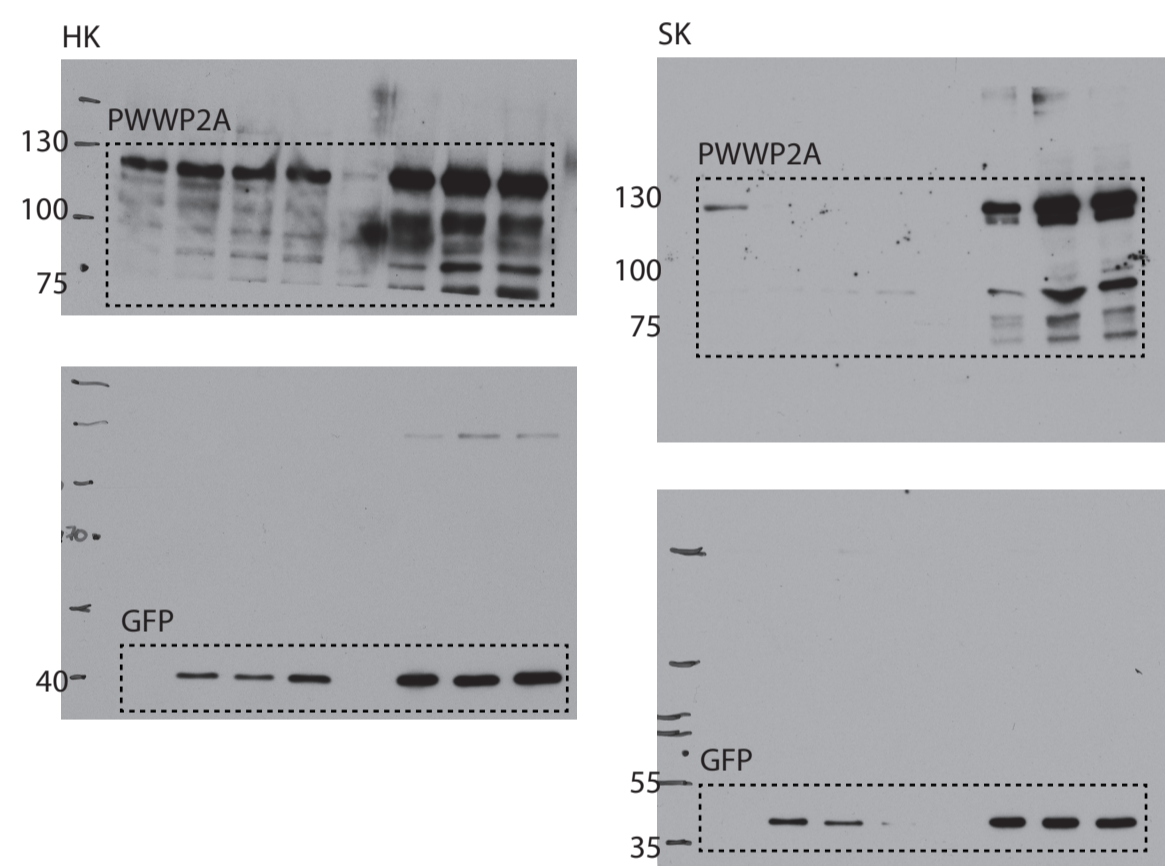

**Figure 1E**

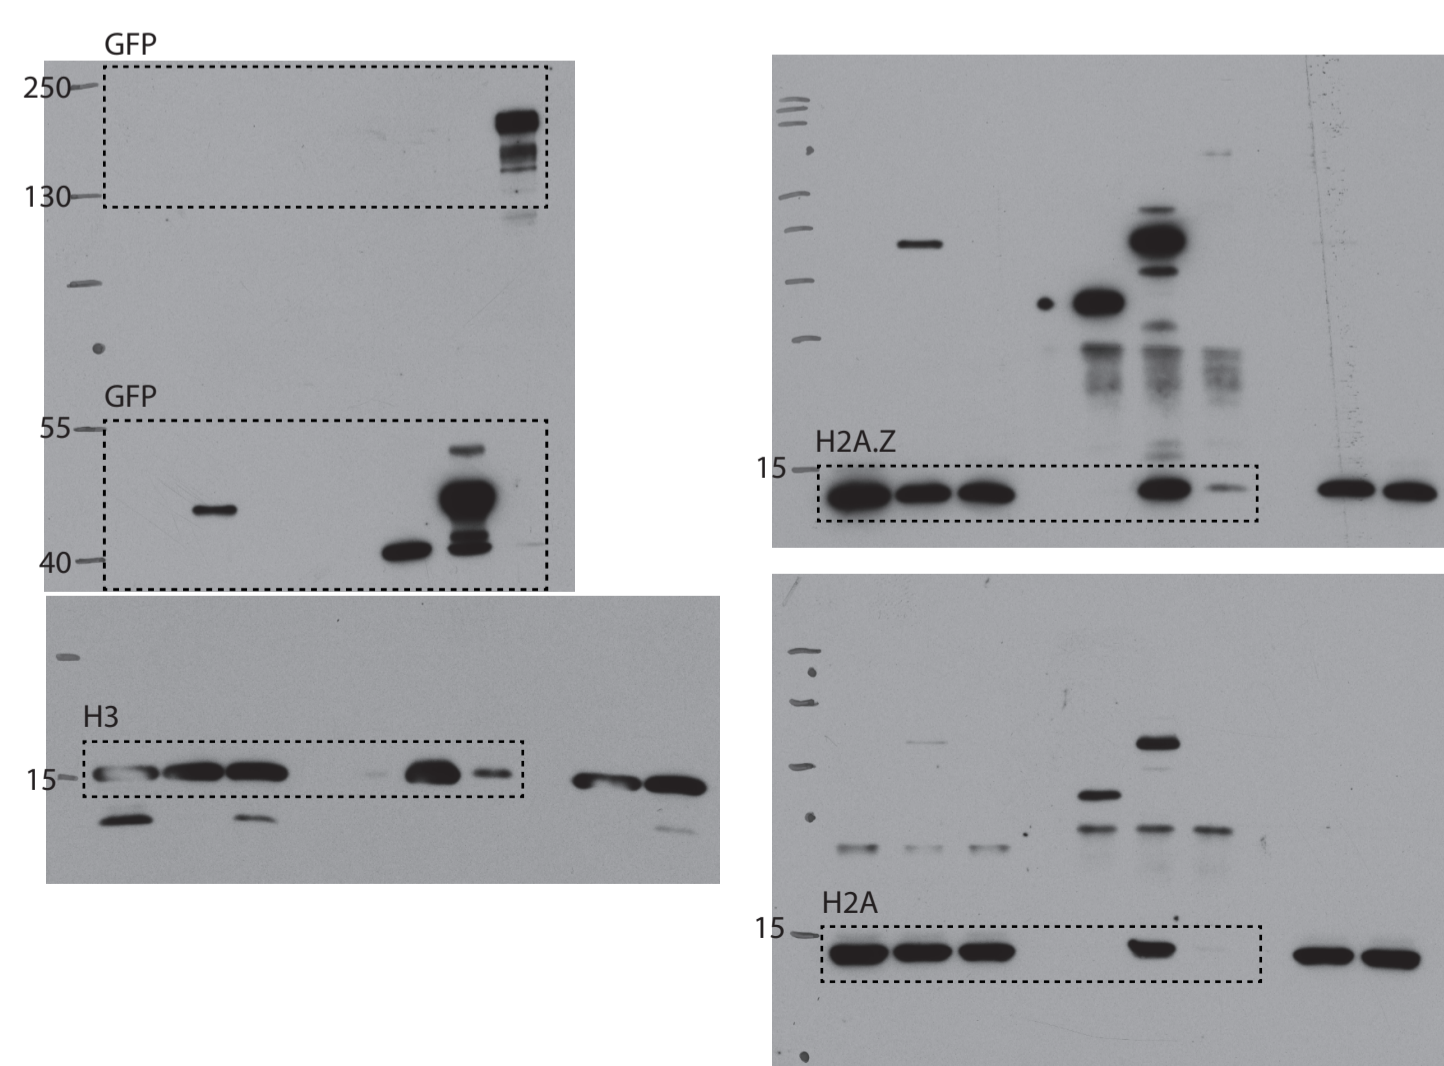

Supplement: EMBJ-36-2263-s012.pdf [file EMBJ-36-2263-s012.pdf]

**Figure 2G**

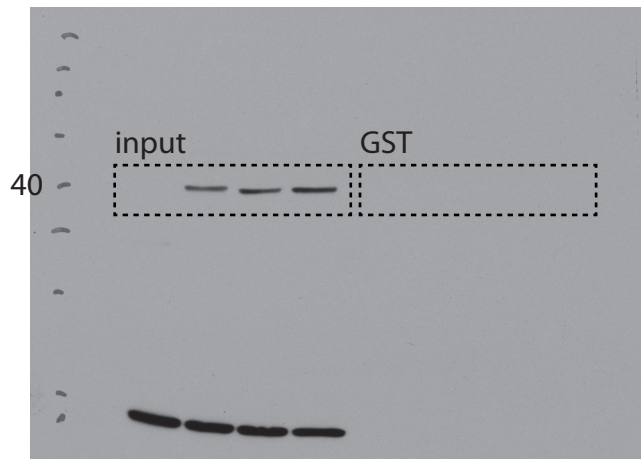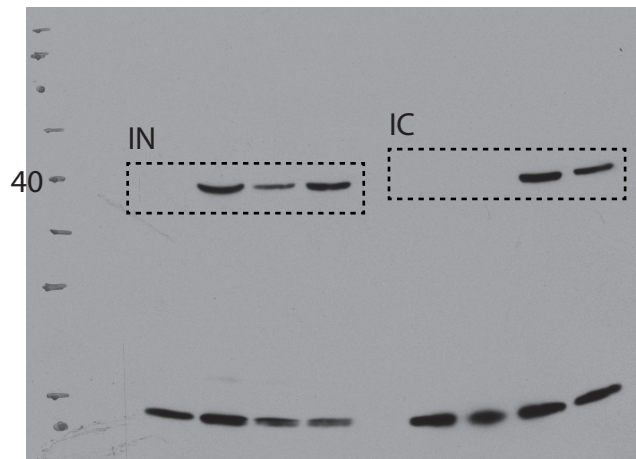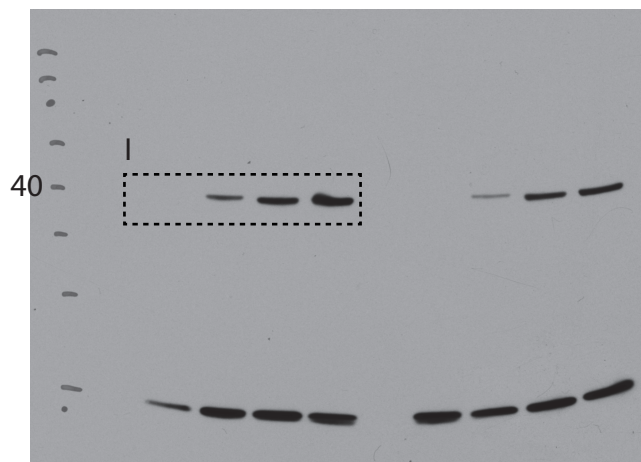

Supplement: EMBJ-36-2263-s013.pdf [file EMBJ-36-2263-s013.pdf]

**Figure 7D**

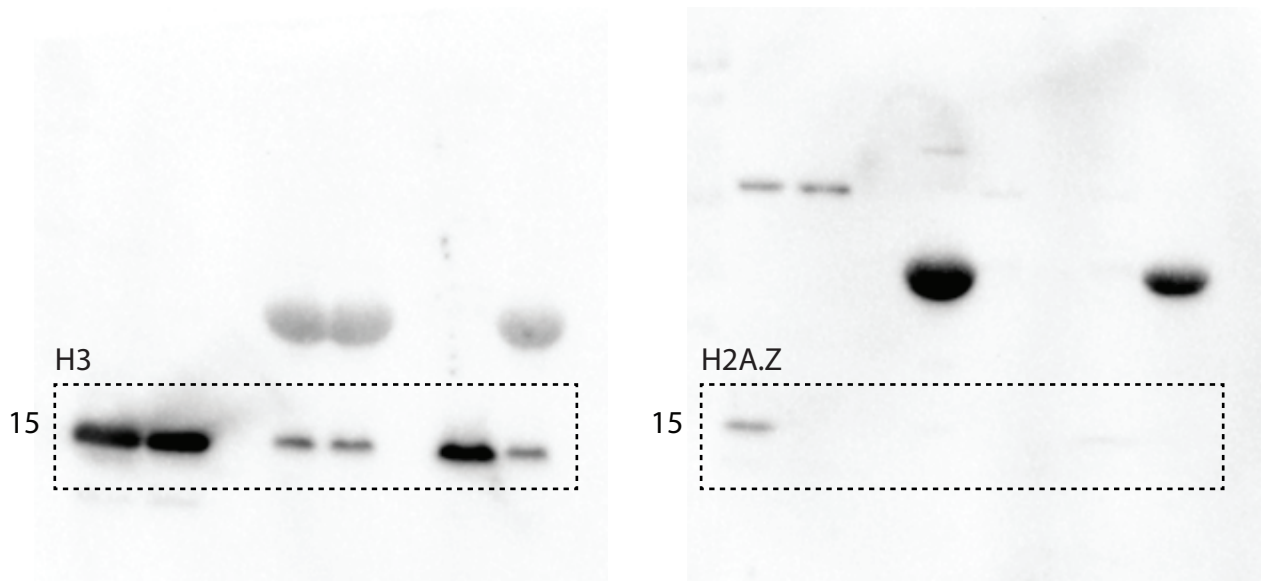

**Figure 7E**

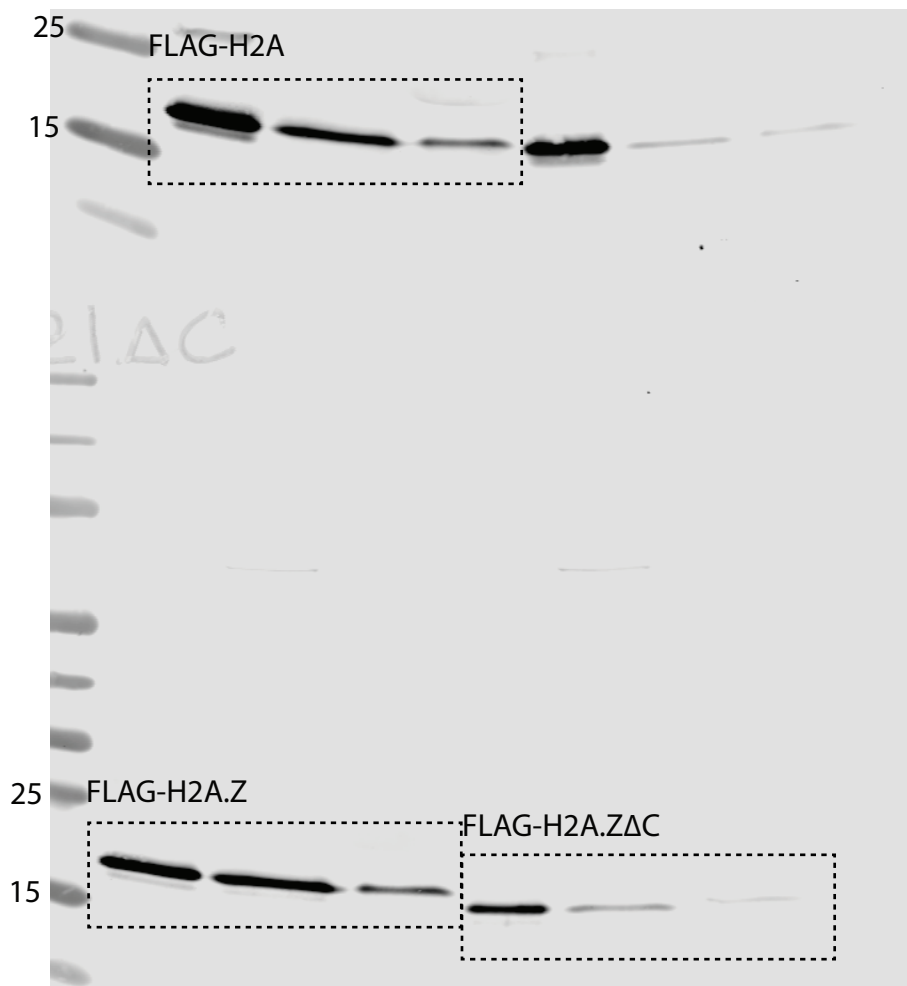

Supplement: EMBJ-36-2263-s014.pdf [file EMBJ-36-2263-s014.pdf]
